# Supplementary material
Source: publisher site journal article supplement (https://www.dovepress.com/article/397969)
Supplement: Supplementary file 1 [file get_supplementary_file.php]

| **Table S1 Characteristics of the main compounds in Kanglaite injection** | | | | | | |
| --- | --- | --- | --- | --- | --- | --- |
| NO. | Mol ID | Molecule Name | PubChem  CID | Molecular Formula | SMILES | DL |
| 1 | MOL001494 | Mandenol | 5282184 | C20H36O2 | CCCCCC=CCC=CCCCCCCCC(=O)OCC | 0.19 |
| 2 | MOL008121 | 2-Monoolein | 5319879 | C21H40O4 | CCCCCCCCC=CCCCCCCCC(=O)OC(CO)CO | 0.29 |
| 3 | MOL002882 | [(2R)-2,3-dihydroxypropyl] (Z)-octadec-9-enoate | 11451146 | C21H40O4 | CCCCCCCCC=CCCCCCCCC(=O)OCC(CO)O | 0.3 |
| 4 | MOL002372 | (6Z,10E,14E,18E)-2,6,10,15,19,23-hexamethyltetracosa-2,6,10,14,18,22-hexaene | 11975273 | C30H50 | CC(=CCCC(=CCCC(=CCCC=C(C)CCC=C(C)CCC=C(C)C)C)C)C | 0.42 |
| 5 | MOL008118 | Coixenolide | 46173943 | C38H70O4 | CCCCCCC=CCCCCCCCCCC(=O)OC(C)C(C)OC(=O)CCCCCCCC=CCCCCCC | 0.43 |
| 6 | MOL001884 | Omaine | 220401 | C21H25NO5 | CNC1CCC2=CC(=C(C(=C2C3=CC=C(C(=O)C=C13)OC)OC)OC)OC | 0.51 |
| 7 | MOL000953 | CLR | 5997 | C27H46O | CC(C)CCCC(C)C1CCC2C1(CCC3C2CC=C4C3(CCC(C4)O)C)C | 0.68 |
| 8 | MOL000458 | campesterol | 173183 | C28H48O | CC(C)C(C)CCC(C)C1CCC2C1(CCC3C2CC=C4C3(CCC(C4)O)C)C | 0.72 |
| 9 | MOL000298 | ergosterol | 444679 | C28H44O | CC(C)C(C)C=CC(C)C1CCC2C1(CCC3C2=CC=C4C3(CCC(C4)O)C)C | 0.72 |
| 10 | MOL000359 | sitosterol | 222284 | C29H48O | CCC(CCC(C)C1CCC2C1(CCC3C2CC=C4C3(CCC(C4)O)C)C)C(C)C | 0.75 |
| 11 | MOL000449 | Stigmasterol | 5280794 | C29H48O | CCC(C=CC(C)C1CCC2C1(CCC3C2CC=C4C3(CCC(C4)O)C)C)C(C)C | 0.76 |
| 12 | MOL000508 | Friedelin | 91472 | C30H50O | CC1C(=O)CCC2C1(CCC3C2(CCC4(C3(CCC5(C4CC(CC5)(C)C)C)C)C)C)C | 0.76 |
| 13 | MOL001874 | isoarborinol | 12305182 | C30H50O | CC(C)C1CCC2C1(CCC3(C2(CC=C4C3CCC5C4(CCC(C5(C)C)O)C)C)C)C | 0.77 |
| 14 | MOL001323 | Sitosterol alpha1 | 9548595 | C30H50O | CC=C(CCC(C)C1CCC2C1(CCC3C2=CCC4C3(CCC(C4C)O)C)C)C(C)C | 0.78 |

| **Table S2** **The binding energy of the active compounds to the targets.** | | | |
| --- | --- | --- | --- |
| Target  Active  compound | CDK1 (PDB ID:6GU2)  （kcal/mol） | CDK2  (PDB ID:7VDU)（kcal/mol） | CHEK1 (PDB ID:2YEX)  （kcal/mol） |
| Mandenol | -2.81 | -2.37 | -1.52 |
| 2-Monoolein | -0.19 | -1.79 | -0.77 |
| [(2R)-2,3-dihydroxypropyl] (Z)-octadec-9-enoate | -0.11 | -1.02 | -0.93 |
| (6Z,10E,14E,18E)-2,6,10,15,19,23-hexamethyltetracosa-2,6,10,14,18,22-hexaene | -2.81 | -3.3 | -3.16 |
| Coixenolide | / | / | / |
| Omaine | -4.59 | -4.93 | -4.14 |
| CLR | -5.47 | -6.1 | -5.98 |
| campesterol | -5.96 | -7.64 | -6.51 |
| ergosterol | -6.82 | -7.42 | -7.13 |
| sitosterol | -6.74 | -7.2 | -5.35 |
| Stigmasterol | -6.64 | -7.89 | -6.23 |
| Friedelin | -7.29 | -8.74 | -7.64 |

**Table S3 Docking grid x,y,z and angstroms**

|  | CDK1 | | | | CDK2 | | | | CHEK1 | | | |
| --- | --- | --- | --- | --- | --- | --- | --- | --- | --- | --- | --- | --- |
| x | y | z | angstrom | x | y | z | angstrom | x | y | z | angstrom |
| isoarborinol | 316.541 | 225.822 | 202.653 | 0.375 | 41.917 | 39.555 | 47.375 | 0.375 | 13.788 | 34.728 | 16.656 | 0.375 |
| Sitosterol alpha1 | 316.541 | 225.822 | 202.653 | 0.375 | 41.917 | 39.555 | 47.375 | 0.375 | 13.788 | 34.728 | 16.656 | 0.375 |
